# Supplementary material for: AgIn: measuring the landscape of CpG methylation of individual repetitive elements
Source: PubMed Central journal article supplement — Bioinformatics. 2016 Jun 17;32(19):2911–9. doi: 10.1093/bioinformatics/btw360 (PMC5039925; doi:10.1093/bioinformatics/btw360), 2016-06-17

**A (20% of 29.9x)**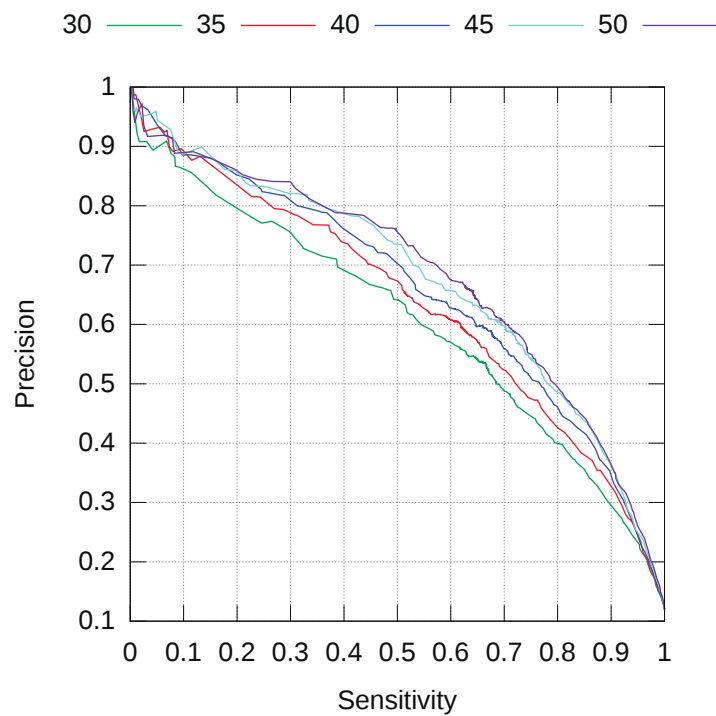**B (40% of 29.9x)**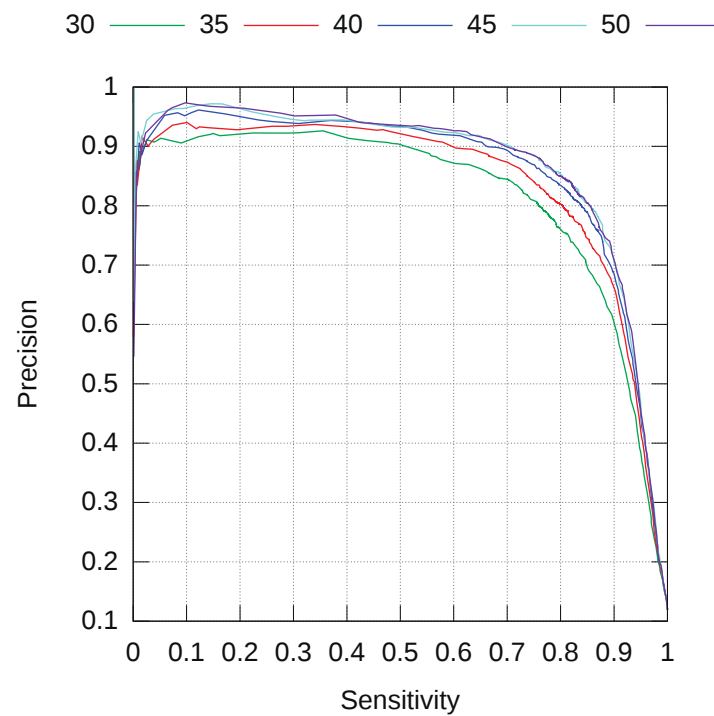**C (60% of 29.9x)**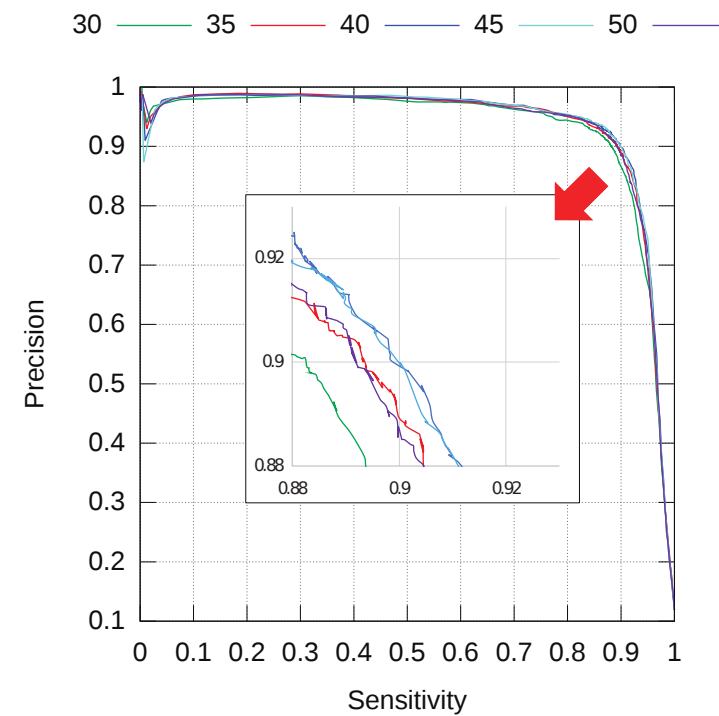**D (80% of 29.9x)**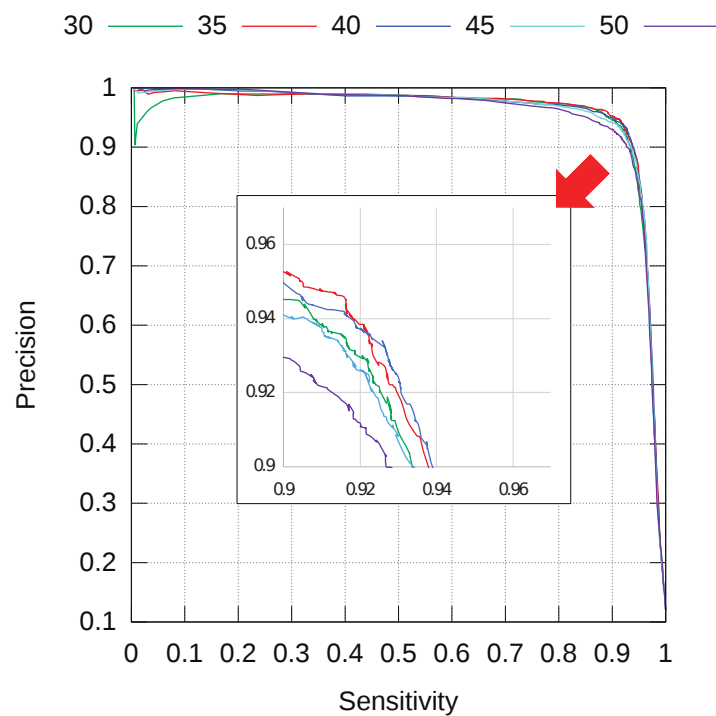**E (100% of 29.9x)**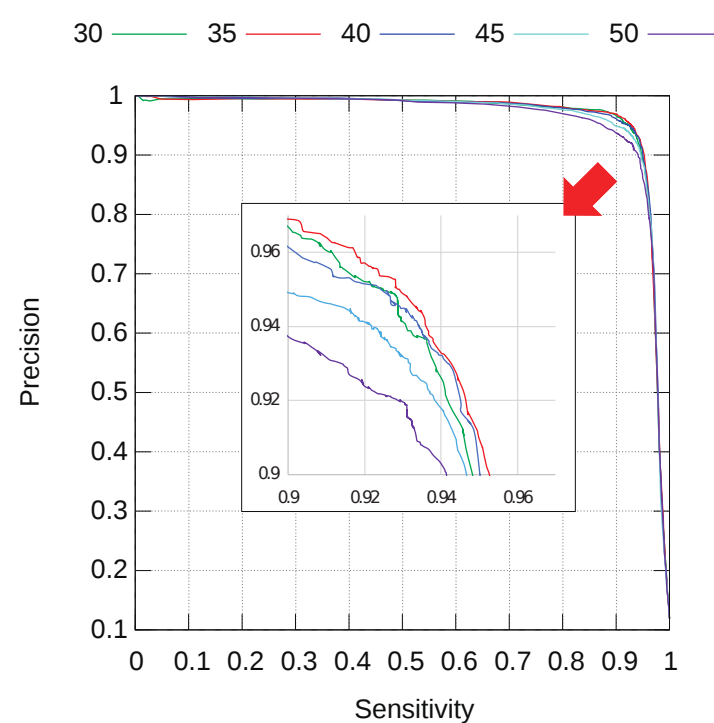**F (100% of 29.9x) b=35, b=1**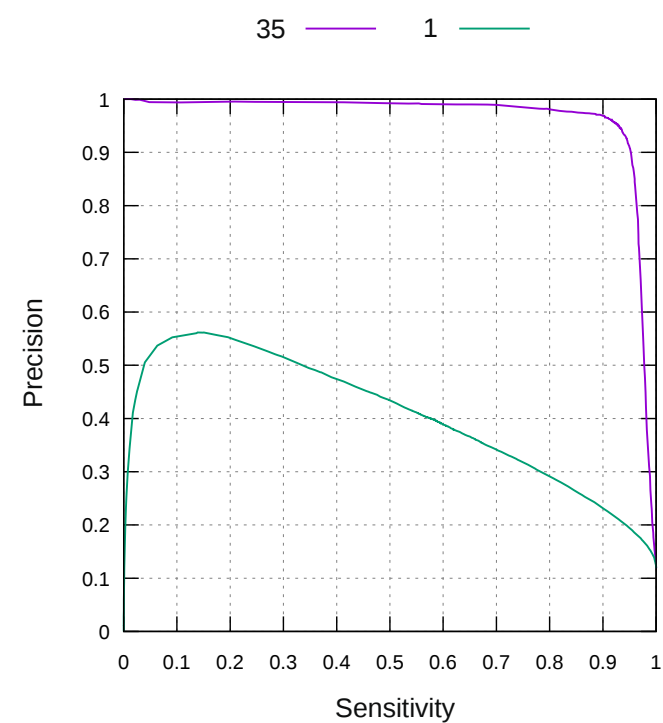**G (100% of 29.9x) b=35****original or simplified parameter**

w/Original Beta — w/Simplified Beta —

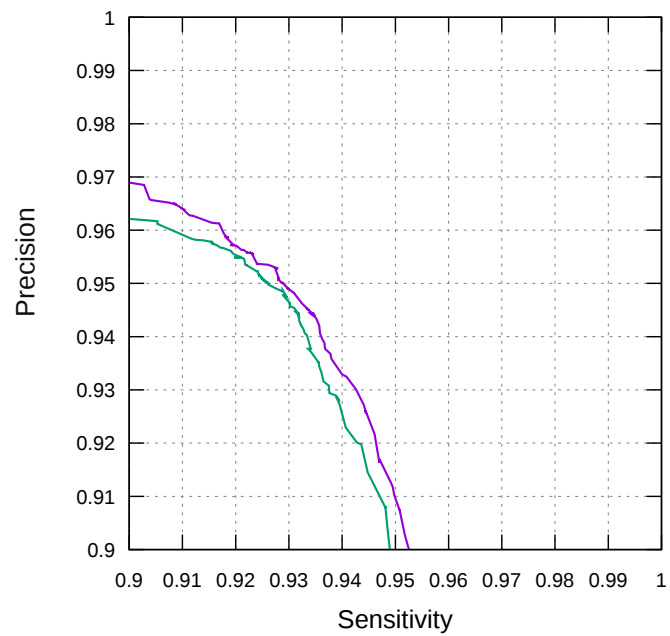

Supplement: supp_btw360_Supplementary_Figure3.pdf [file supp_btw360_Supplementary_Figure3.pdf]
