# Supplementary material for: AgIn: measuring the landscape of CpG methylation of individual repetitive elements
Source: PubMed Central journal article supplement — Bioinformatics. 2016 Jun 17;32(19):2911–9. doi: 10.1093/bioinformatics/btw360 (PMC5039925; doi:10.1093/bioinformatics/btw360), 2016-06-17
Supplement: supp_btw360_Supplementary_Figure5.pdf [file supp_btw360_Supplementary_Figure5.pdf]

Sequence ID #5: LINE-1 (1 of 2)  
 Prediction: Hypomethylated  
 Region: chrX:17,366,059-17,366,763

|   |                                     |   |                                   |
|---|-------------------------------------|---|-----------------------------------|
| C | # : Methylated CpG                  | C | # : Unmethylated CpG              |
| * |                                     | T |                                   |
| C |                                     | C |                                   |
| ! | ! : Unconverted CpH (CpA, CpC, CpT) | : | : : Converted CpH (CpA, CpC, CpT) |
| C |                                     | T |                                   |

```

Genome      301  GGGAGTGACCCAATTTTCCAGGTGCCGTCCATCACCCCTTCTTTGACTAGGAAAGGGAA
                                | | | | | |
Bisulfite   1    -----GTAAGGGAC

Genome      361  CTCCCTGACCCCTTGCGCTTCCCGAGTGAGGCAATGCCTCGCCCTGCTTCGGCTCGCGCA
:|:::| | ::::| #|:|:| #| | | | | | | : | | | | : : | : : | : | #| : #| #| : |
Bisulfite   10   TTTTTTGMTTTTTYS|GTTTTY|TGAGTGAGGTAATGTTTCYGTTTTGTTC|GGTC|GTGTA

Genome      421  CGGTGCGTGCACCCACTGACCTGCGCCACTGTCTGGCACTCCCTAGTGAGATGAACCTG
*| | | *| | | : : : | : | : | : | *| : : : | : | : | : | : : : | | | | | | | | : : |
Bisulfite   70   CGGTGCGTGTATTTATTGATTGCGTTTATTGTTTGGTATTTTTTAGTGAGATGAATTTG

Genome      481  GTA-CCTTAGATGGAAATGCAGAAATCACCGGTCTTCTGCGTCCGCTCAGCTGGGAGCTA
| | | : : | | | | | | | | | : | | | | | : | ! * | | : | | * ! ! # ! |
Bisulfite   130  GTATTTTATAGATGGAAATGTAGAAATTA|CCGGYTTT-----TCCSCCTCCT-----
  
```

Sequence ID #7: LINE-1 (2 of 2)  
 Prediction: Hypermethylated  
 Region: chr6:123,793,104-123,793,890

```

Genome      301  CCTCAGTCGGGAAGTGCAAGGGGTCAGGGAGTTCCCTTCCGAGTCAAAGAAAGGGGTGA
                                | | | : | | | | | | | | : : : | : | | | : | | | | | | | | | |
Bisulfite   1    -----AGGKTTAGGGAGTTTTTTTTTYYGAGTTAAAGAAA-GGGCGA

Genome      361  CCGACAGCACCTGGAAAATCGGGTCACTCCACCCGAATACTGCGCTTTTTCGACAGGCT
*| | | : : | : : | | | | | | * | | | : : : | : : * | | | : | | * | | | : | | |
Bisulfite   41   CCGATM-TATTTGGAAAATCAGGTTATTTTATTCGAATATTGCGTTTTTTCGATAGG-T

Genome      421  TAAAAAACGGCGCACCACAAGATTATATCCACACCTGGCTCGGAGGGTCTACGCCAC
| | | | | | * | * | : : : | : | | | | | | | : : : | : | | | : | * | | | | | : : | * | : : *
Bisulfite   99   TAAAAAACGGCGTATTATAAGATTATATTTTATA-TTGGTTCCGAGGGTTTACG-TTAC

Genome      481  GGAATCTCGCTGATTGCTAGCACAGCAGTCTGAGATCAAAGTAAAGCGGCAGC-AAGG
| | | | : | * | : | | | | | : | : | : | : | : | | | | | : | : | | | | * | : | : | |
Bisulfite   157  GGAATTTCGTTGATTGTTAGTATAGTAGTTTGGAGATTAATGTAAGCGGTAGTAAASG

Genome      540  CTGGGGGAGGGGCGCCCGCATTGCCAGGCTTTCTTAGGAAAACAAAGCAGCCGGGAAG
: | | | | | | | | * !
Bisulfite   217  TTGGGGAMGGGKCC-----
  
```

Sequence ID #8: LTR (1 of 2)  
 Prediction: Hypomethylated  
 Region: chr11:5,829,621-5,830,339

```

Genome      181  CTATCCTTCACTGGAATCGTAACTGAGGCT--CAATTCGCCTATCCTTTAGCCACCT-
                                | : | ! | : | | : | |
Bisulfite   1    -----GTTGGCA-----TCCMATCTA

Genome      238  --GCTGGAGGCTCTTTGATCCTTTTCGCTTTGTCCACTCTGGCCGCTTCCCTCGTGGGAA
: | | | | | : | | | | : | : : | | # | : | | | | : : : | : | : | : | : | : | : | : |
Bisulfite   17   TWRTTGGAGGTTYTTTGTATTTTTTTGTTTTGTTTATTTTGGTGTTTTTTTTGTGGGAA

Genome      296  TATTTAGGTTTCTTCTTAGCCTTGATGGCGGGTACAGCATAAACCCCTGAT-GGGACCCC
| | | | : | | | | : : | : | | | | | | | | | : | : | : | : | : | : | : | : | : |
Bisulfite   77   TATTTAGGTTTTTTTTTAGTTTTGATGGYGGGTTAGTATAAATTTTTGATKGGGATC---
  
```

Sequence ID #9: LTR (2 of 2)  
 Prediction: Hypomethylated  
 Region: chr1:89,663,480-89,664,077

|                                        |                                      |
|----------------------------------------|--------------------------------------|
| C                                      | C                                    |
| * : Methylated CpG                     | # : Unmethylated CpG                 |
| C                                      | T                                    |
| C                                      | C                                    |
| ! : Unconverted CpH<br>(CpA, CpC, CpT) | : : Converted CpH<br>(CpA, CpC, CpT) |
| C                                      | T                                    |

```

          GTTACAGGAAAGTAAACAGTACTAGGTGCAGGGGCTTTAATTCATCA-CAAGGTGATAG
                    |||!|          ||  |:| :|  ||| ||| |||
Bisulfite  129  -----TACTA-----TTWMWTTTAWTAWWAAGGTGATAG

Genome      352  AAGCGGGGCTTTGGGCTTTATCAACCAGACACAAA CCGGGGGGCTCTGGGTGCTGTAA
||| ||| |:| ||| |:| ||| |:| ||| |:| ||| #:| ||| |:| ||| |:| |||
Bisulfite   158  AAGWGGGGTTTGGGTTTTATTAATTAGATATAAA TG-GGGGGTGGGTGTTGCTAA

Genome      412  CCGGGCGAAT-TCTGGGAAGTGGGGTATGGCTTGCCACAGTACCTTATCAGTTAATTG
:#||| ||| |!!|
Bisulfite   217  TTGGGYGAACTCCCG-----
  
```

Sequence ID #11: LTR26C  
 Prediction: Hypomethylated  
 Region: chr19:11,848,508-11,850,380

```

Genome      661  ACCAGCGACCCACACTCCAGCCGTCCTGTCCACACCTCTAAACACCCCATCCCCAAC
          ! !: |:| ! ! !*  !|  !|          :::| :::| ||:
Bisulfite   1   -----CYCTATAC-CCCCCGCYCC-----TTTTTTTTTTTAAAT

Genome      721  CTCTCAGGGAGGCGGATCTGGGGTGTCTCCCTCTCCCCATTAACCTGTTTCTGTGTC
:|:|:| | | || :| ||| | :| ::::| :| ::::| | |||:| |||:| |:|
Bisulfite   34  TTTTTTKKRRGKGGGGTGGGGGKTTTTTTTTTTTTTATCAAATTGTTTTGTGT

Genome      781  AGCCTTCGGCGTCTCGGTGCAGTACTCGGGCCGTGAACCTGTGC CGGTTACAACCTGCAC
:|:#|:#|:|#| |:| |:| |:| #:| |:| #:| |:| #:| |:| #:| |:| #:|
Bisulfite   94  AGTTTTTGGTGTGTTGGTGTAGTGTATTGGGTGTGTAATTTGTGTGGTTATAATTGTAT

Genome      841  AATCTGGGAGACCGGGAGCTCGGGCGGGAGCTGCCAGAGAGGGCGCCGGGGCCGGG
|||:| ||| ||| #:| #:| |:| #:| #:| #:| |:| :::| ||| ||| #:| #:| |:| #:|
Bisulfite   154  AATTTGGGAGATGTGGAGTTGTGGGTGTGGAGTTGTTAGAGAGGGTGTGGGGTGGG

Genome      901  GCCGCAGCGGCCGAGCAGGGACGGGACAGGACGCCCGGGGTCCCGGCTGCCGCCCCAGCC
|:#|:| #:| #:| |:| #:| #:| #:| #:| #:| #:| #:| #:| #:| #:| #:| #:|
Bisulfite   214  GTGTAGTGGTTGAGTAGGATGGGATAGGATGTTGGGGTTTTGGTTGTTGTTTTAG-T

Genome      961  CCATCTGCGGCCA-GGGGACCAAGGGCAGAGCTGCCAGGGGCACTGGGATTTGCAG
:|:|:| | | :::| | | !!| | !  *
Bisulfite   273  TTATTTYGYSGTTACGCCGMC AAMCS-----YYMC-----
  
```

Sequence ID #15: MIR2  
 Prediction: Hypermethylated  
 Region: chr19:47,905,568-47,906,031

```

Genome      1   TCTCTCTCTGGGGGTGGAGGGGACAGAGATCTGAAAACCTGAGAACCCCAAGGGACTCA
          ||| | | !| |  ||| ||| |:| ||| |:| ||| |:| ||| |:|
Bisulfite   1   -----CCTGGACGAGACCG-----TGGAAAATTGAGAATTTTAAGGGATTTA

Genome      61  CACTGGTTTCTGAGCCTCAGTTTTCTAGTTACAAAGGACAGCCTCTGCCTGTGATGGGC
:|:| ||| |:| ||| :::| |:| ||| |:| ||| |:| ||| |:| ||| |:| ||| |:|
Bisulfite   43  TATTGGTTTTGAGTTTTAGTTTTTATGTTATAAAGGATAGTTTTGTTGTGATGGGG

Genome      121  GCTGACACA C GTGGCACAGTTCCCCATGTGTCCCTCGAAATACCTCCACCATCAGCACAA
|:| |:| |:| *| |:| |:| |:| :::| |:| |:| :::| *| |:| |:| |:| |:| |:|
Bisulfite   103  GTTGATATA CGTGGTATAGTTTTTTATGTGTTTTTCGAAATATTTTATTATTAGTATAA

Genome      181  TCATCCTACGAGACAGGCA CGGC CGCTCTCCCATTTCTCCAGATGTGGAACCGGGGCC
|:| |:| :| *| |:| |:| *| |:| *| |:| |:| :::| |:| |:| |:| |:| |:| *|
Bisulfite   163  TTATTTTACGAGATAGGTA CGGT CGTTTTTTTTTATTTTTTAGATGTGGAATCGGGGTTT

Genome      241  AGCCAGGTGAAGT CGTAA-CCCGAGGTGCCA-TAGCTGTTGCGTTCCAGAGGC GAGA-TT
||:| |:| ||| ||| *| ||| ::*| ||| |:| |:| |:| ||| *| |:| ||| *| |||
Bisulfite   223  AGTTAGGTGAAGT CGTAATTCGAGGTGTTATTAGTTGTTGCGTTTTAGAGGC GAGATTT

Genome      298  CAAACCC--ACGTC CGTCCGGAAGCCTTGGAAGTGAGGGTGTGCTGCCTAACCTGCTCA
:| | | :| | | | :| *
Bisulfite   283  TAAAWTTWAWYSTTC-----
  
```
