# Supplementary material for: AgIn: measuring the landscape of CpG methylation of individual repetitive elements
Source: PubMed Central journal article supplement — Bioinformatics. 2016 Jun 17;32(19):2911–9. doi: 10.1093/bioinformatics/btw360 (PMC5039925; doi:10.1093/bioinformatics/btw360), 2016-06-17
Supplement: supp_btw360_Supplementary_Table3.pdf [file supp_btw360_Supplementary_Table3.pdf]

| Sequence_Id | Sequence_Name                    | Region                       | Primer_Sequence (5' to 3')                           | Primer Sequence (for nested PCR) (5' to 3')                   |
|-------------|----------------------------------|------------------------------|------------------------------------------------------|---------------------------------------------------------------|
| 1           | FLI_CHR11_F<br>FLI_CHR11_R       | chr11:92,869,695-92,870,491  | TGTATGAGTATGTTTAGTGT<br>CTACTATCTTTTTATTATCTATACCC   | TATATGGGGGAGGAGTTAAGATGGT<br>CACCCCTTTCTTAACTCAAAAAA          |
| 2           | FL_CHR7_F<br>FL_CHR7_R           | chr7:34,945,686-34,946,552   | GAATATATGAGTAAATGAAGGATGT<br>TACCCCAAAAAATAAAACT     | TTTTATTAGGGAGTGTAGATAGTGGG<br>TATTAATACCCCTCCCAACCTC          |
| 3           | FL_CHR8_F<br>FL_CHR8_R           | chr8:98,307,662-98,308,329   | TTGGTATTTGTAAGAAATTAGGGA<br>CTTACACTTCCCAATAAAACAA   | TGATTTTTGTATTTTTATTTGAGGTAT<br>ATAAAACAATACCTCACCTACTTC       |
| 4           | FL_CHR19_F<br>FL_CHR19_R         | chr19:35,351,062-35,351,674  | AAGATATTTATTTAAGGAGGAG<br>ACCTAATCAAACCTAAACAATAAC   | GGTGATTTTTGTATTTTTAGTTGAGGTAT<br>AAAAAACTCCCTAACCCCTTAC       |
| 5           | FL_CHRX_F<br>FL_CHRX_R           | chrX:17,366,059-17,366,763   | GGTGGGAGTGATTTAATTTTTTA<br>ACTTTATTTATACAACCTCTATTTC | GAAAGGGAATTTTTGATTTTTTTG<br>AAAACACTCTAATCTATAACTCCCAAC       |
| 6           | FL_CHR1_F<br>FL_CHR1_R           | chr1:90,218,123-90,218,684   | TTTGGTTGTTTTGTTTATTTAAGT<br>ATCTCTTAATACCTTAACC      | TTAAGTAAGTTTGGGTAATGGTGGG<br>AAAAAATCAAAAAATTCCTTTCC          |
| 7           | FL_CHR6_F<br>FL_CHR6_R           | chr6:123,793,104-123,793,890 | GGAAGGATAAATAGTTAATAAAGG<br>CCCAAAATAAAACCTACAAAA    | TTATTAGGGAATGTAGATAGTGGG<br>TTTCTAAAAAACCTAAACAATAAC          |
| 8           | LTR_CHR11_F<br>LTR_CHR11_R       | chr11:5,829,621-5,830,339    | TTGTAATATTTTTATATTGGG<br>AAAAAATCTTCAATCATCCT        | TTGTTGGAGGTTTTTTGATTTTTTT<br>ATCCAATCTATAATTCTATAATCACCTCAT   |
| 9           | LTR_CHR1_F<br>LTR_CHR1_R         | chr1:89,663,480-89,664,077   | AAATTTTTGTTTTTTGGAGTTTTA<br>TAACTCTCCCTTAACTAAAA     | TTTTAATTTTATTATAAGGTGATAGAAG<br>TAAATACTATAACAAACCATAACC      |
| 10          | LTR_CHR6_F<br>LTR_CHR6_R         | chr6:26,924,100-26,924,635   | AAGTTTTTTAAAGTTTTTATTAG<br>ACCTACCATACTAAAACCT       |                                                               |
| 11          | LTR26C_CHR19_F<br>LTR26C_CHR19_R | chr19:11,848,508-11,850,380  | AGGTTGAAGATTTTATAAGGGAA<br>TAAAACCCACACTAACTTTT      | TTTTATTTTTAAATTTTTTAGGGAGG<br>ATCTACAAATCCCAATACCCCTAAC       |
| 12          | AluSc_F<br>AluSc_R               | chr15:80,352,853-80,353,500  | AGTTGTAATTAGTTGTGAGGAAGT<br>CCCTAAAACCTCAAAAAA       | TTGTAATTTTAGTATTTTGGGAGGT<br>AAAAAAATTTAATCCTATTTCTC          |
| 13          | AluSc2_F<br>AluSc2_R             | chr12:11,667,503-11,668,057  | TTTTGAGTGTTTTTGGTTTTGGA<br>TTTCTCTATTTTCAACTATTACC   | TTTTTATGTTAAGAATAGTTTTGGT<br>TAAATAAAATCTCTCTCTATCACC         |
| 14          | MIR_F<br>MIR_R                   | chr8:145,157,891-145,158,610 | GAGGAGTAAGAAATATAAG<br>RAAACCCAAAATTAACCCCT          | AGTTTTGTAAAGTAGGTTTAGTGGTTTT<br>CCACCTAAATACCCTTAAACAATATATTT |
| 15          | MIR2_F<br>MIR2_R                 | chr19:47,905,568-47,906,031  | GGATAGAGATTTGGAAAATTGA<br>AAACAAATTAACAACACACACC     | TGGAAAATTGAGAATTTAAGGGATTTATA<br>AACACACCCTCACTCCAAAACCTTC    |
| 16          | LTR26E_CHR19_F<br>LTR26E_CHR19_R | chr19:12,510,921-12,511,712  | TTTTGGAAAGAAAGAAGGGAT<br>CATTCTACTAAATAAACTCC        | AATTCAAAATCTAAAACCTCCRAC                                      |
| 17          | LTR26E_CHR1_F<br>LTR26E_CHR1_R   | chr1:245,287,681-245,288,390 | AGGATTAAGAAGAATTTTGGGA<br>CTATAAAACACAACAACTTAACC    | AGAAATATAGTTGTAAGTAAG<br>AAATCCATCTCCCTAAAAA                  |
| 18          | L2b_CHR9_F<br>L2b_CHR9_R         | chr9:137,028,161-137,028,803 | ATATTTTGTAGTTATTTTTGA<br>ACACCCAAATCCAATCCAAA        | ATTTTTTTTAGAATTTAGGG<br>CCCAAAACCTATACAAAAA                   |
| 19          | L2b_CHR8_F<br>L2b_CHR8_R         | chr8:141,097,083-141,098,123 | GGAGTATAGATGGAATATTAATAG<br>CACAACTAATACAAAACCCAAA   | TTGTTTAGGTTAAAATTTAAAGATATTT<br>TACAAAACCCAAAATAATACCAC       |
| 20          | AluY_CHR1_F<br>AluY_CHR1_R       | chr1:202,975,549-202,976,334 | TATTTTGTAAAGTTTAGGGGTGT<br>CCCACACCTATATTAATAAAA     | GTGTTTTTTTTGTTTGTGGT<br>TTCTTCTAATAACTCTCT                    |
| 21          | LSUrRNAHsa_F<br>LSUrRNAHsa_R     | chr9:79,186,495-79,187,160   | AGTTTTTTATTGGGATGGTATGT<br>CCCTTCTTTTTTCTTTTTTC      | TTTTTTAATAAATGAGATGGGG                                        |
