# Supplementary figures and images for: AgIn: measuring the landscape of CpG methylation of individual repetitive elements
Source: PubMed Central journal article supplement — Bioinformatics. 2016 Jun 17;32(19):2911–9. doi: 10.1093/bioinformatics/btw360 (PMC5039925; doi:10.1093/bioinformatics/btw360), 2016-06-17

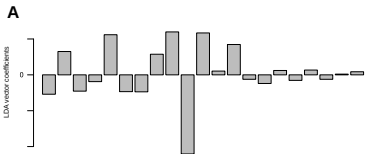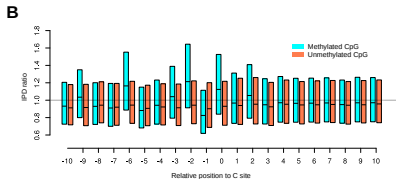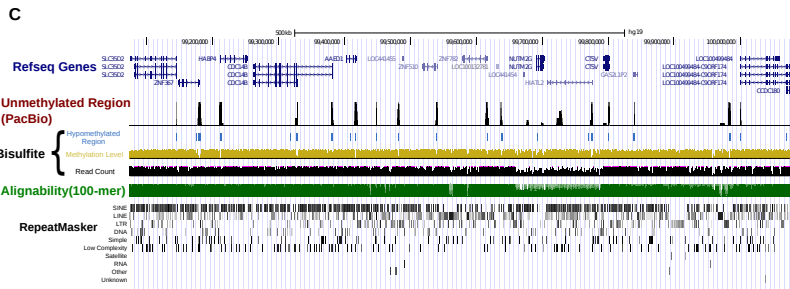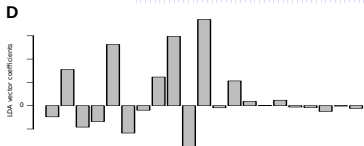

Supplement: supp_btw360_Supplementary_Figure1.pdf [file supp_btw360_Supplementary_Figure1.pdf]

**A**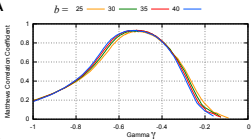**B**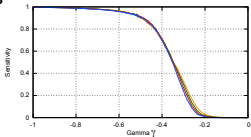**C**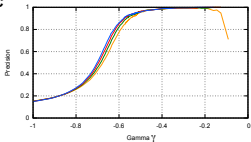

Supplement: supp_btw360_Supplementary_Figure2.pdf [file supp_btw360_Supplementary_Figure2.pdf]

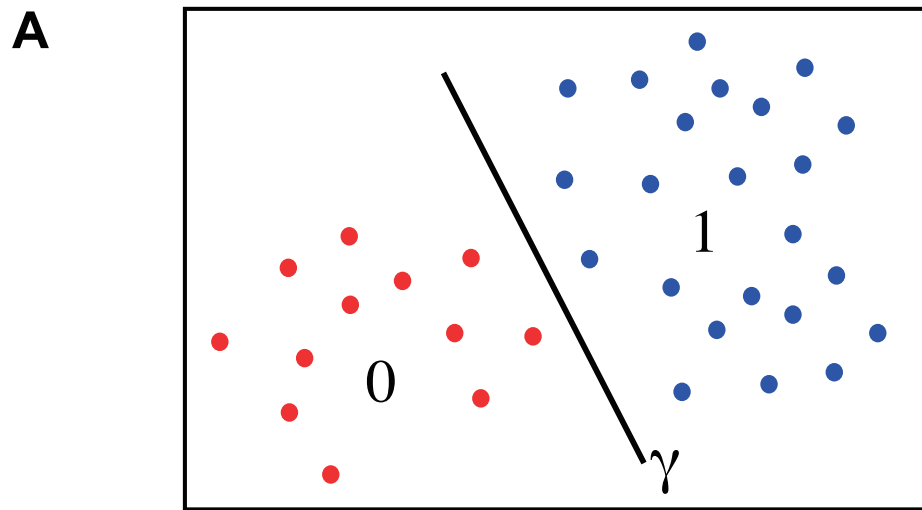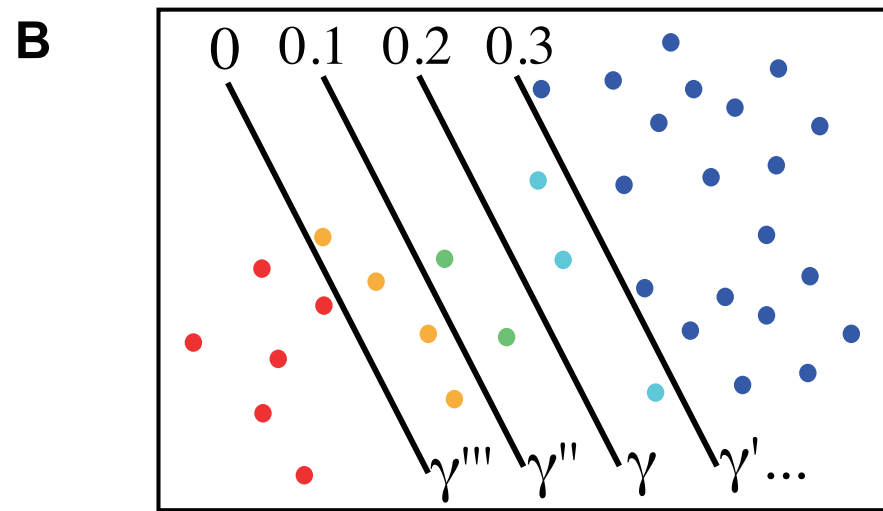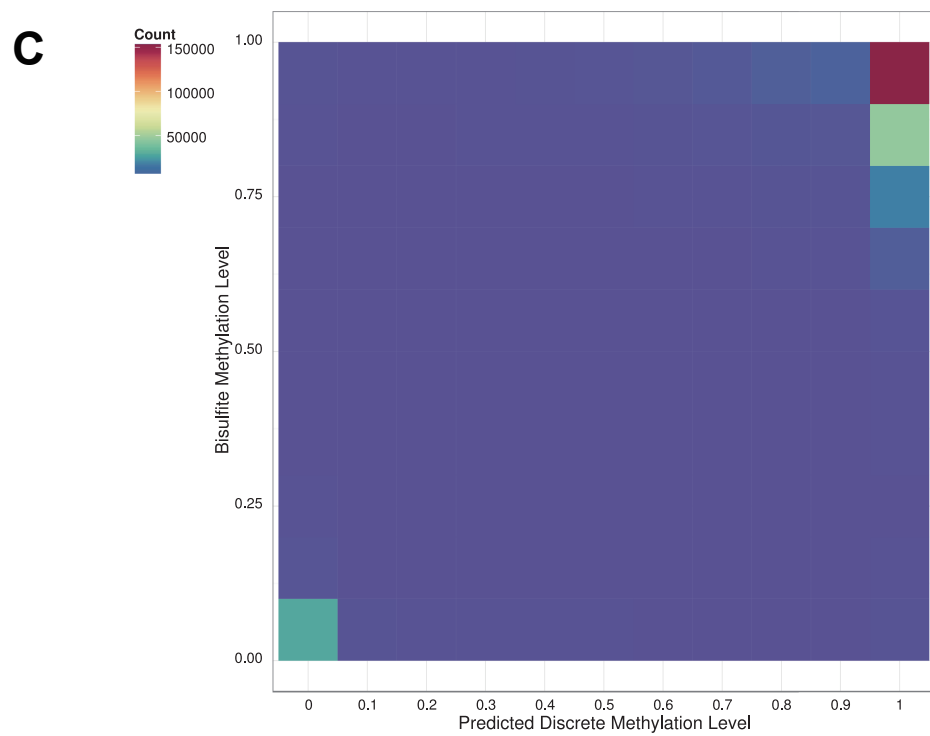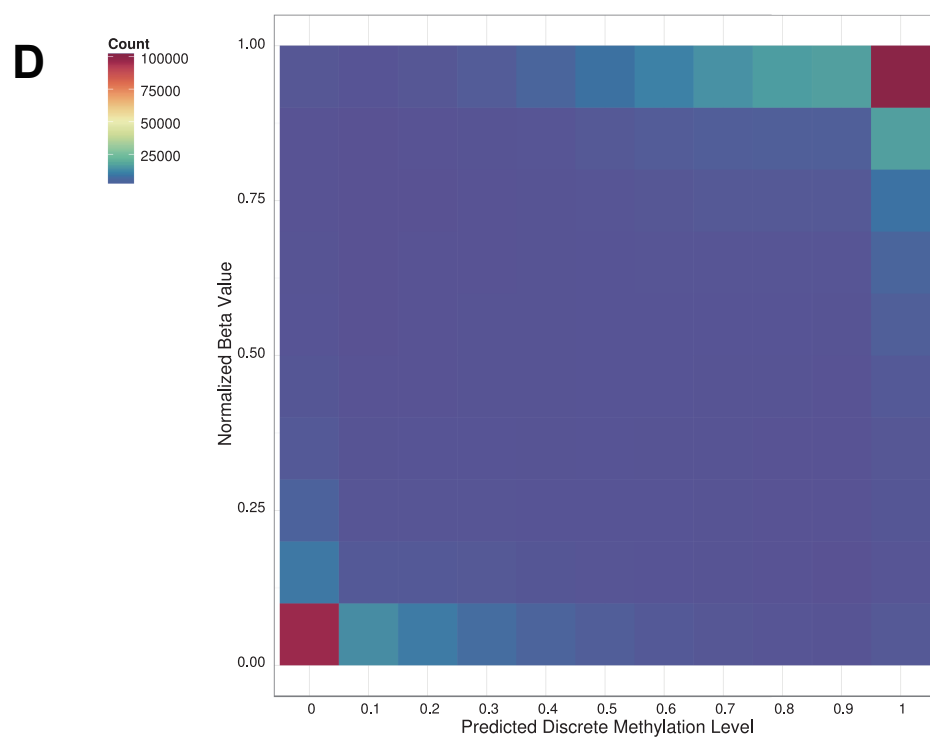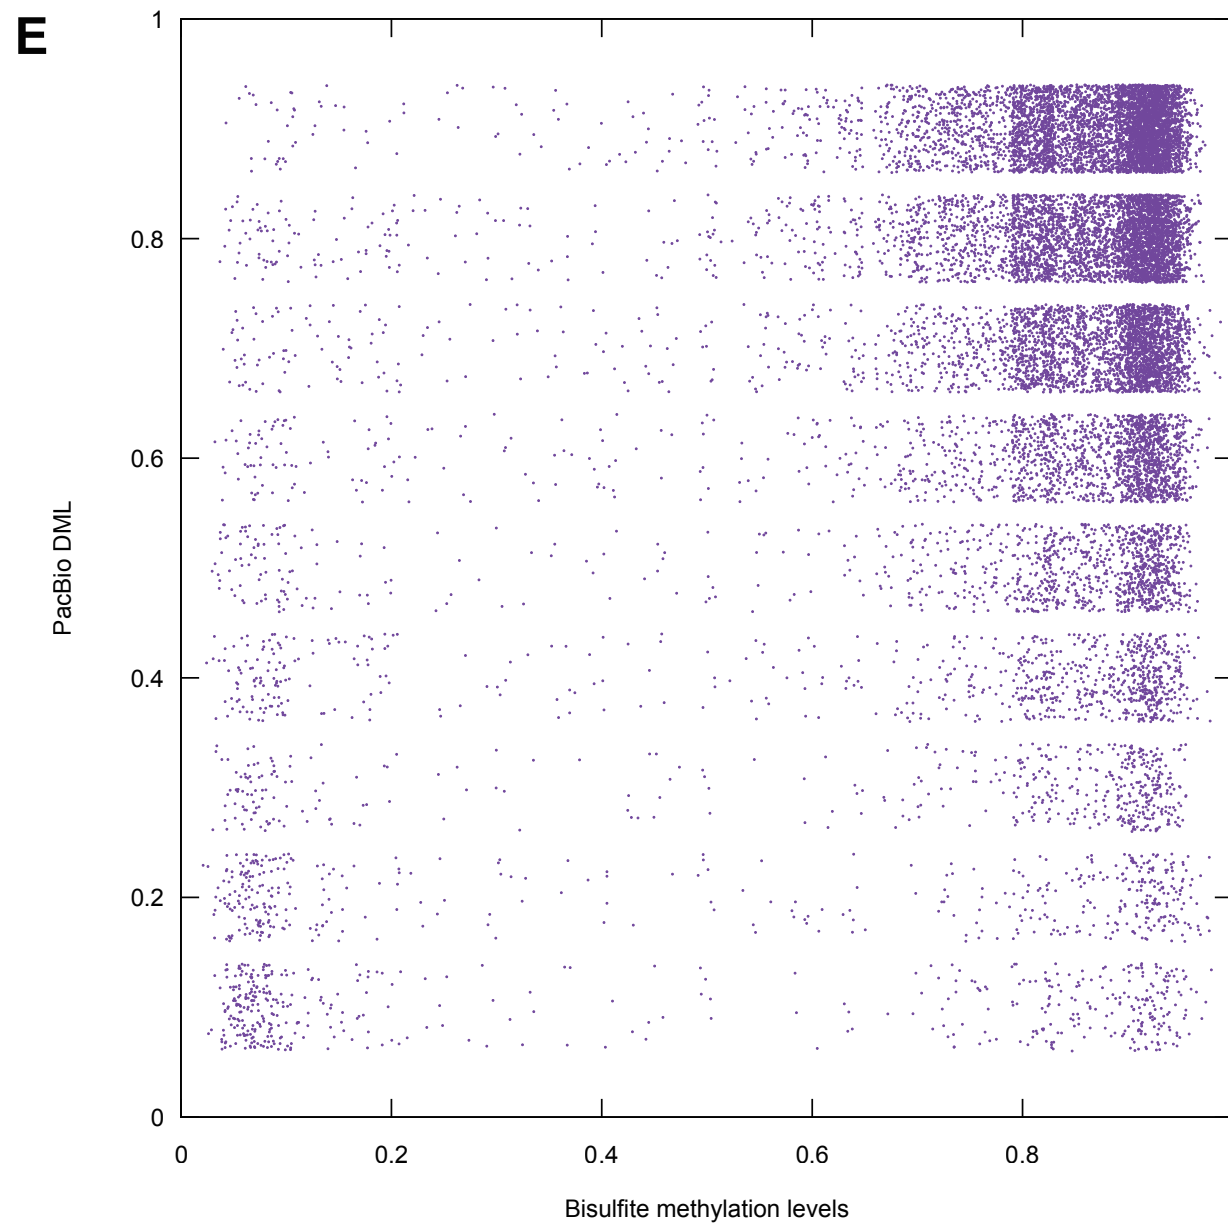

Supplement: supp_btw360_Supplementary_Figure4.pdf [file supp_btw360_Supplementary_Figure4.pdf]

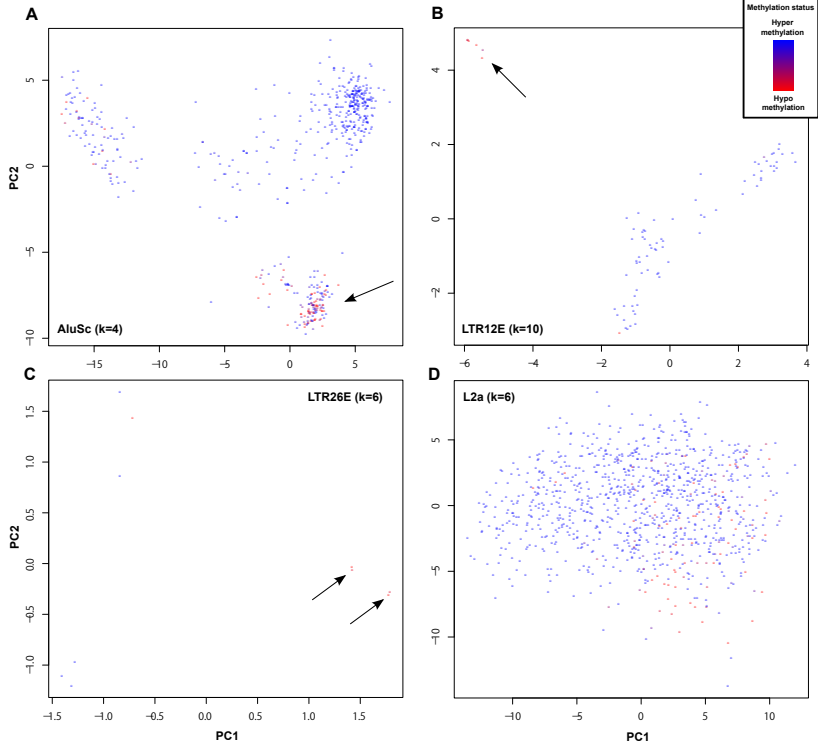

Supplement: supp_btw360_Supplementary_Figure6.pdf [file supp_btw360_Supplementary_Figure6.pdf]

A

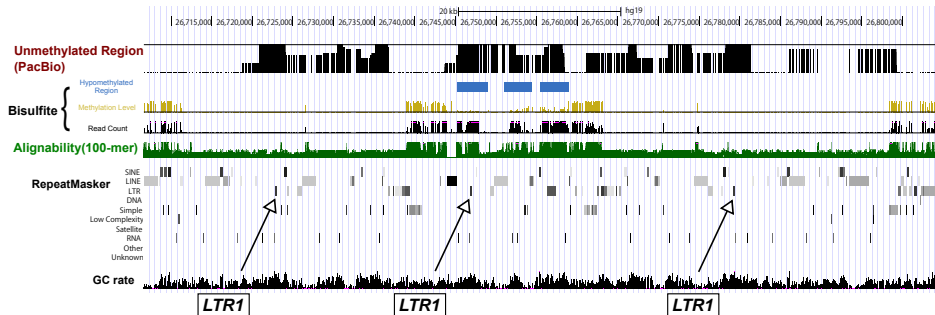

B

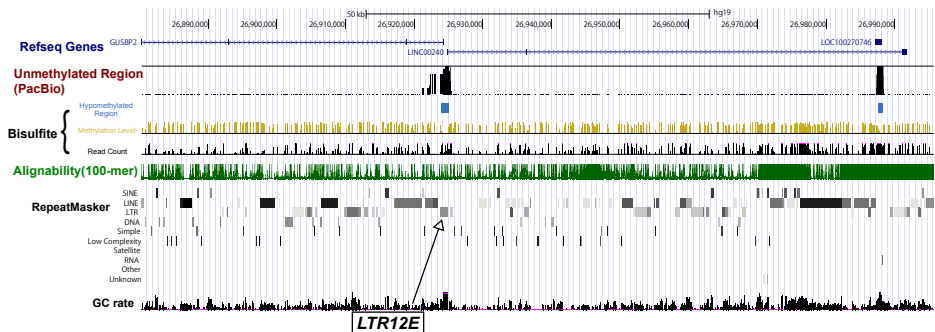

Supplement: supp_btw360_Supplementary_Figure7.pdf [file supp_btw360_Supplementary_Figure7.pdf]

**A**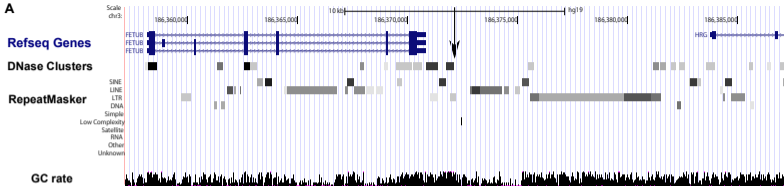**B**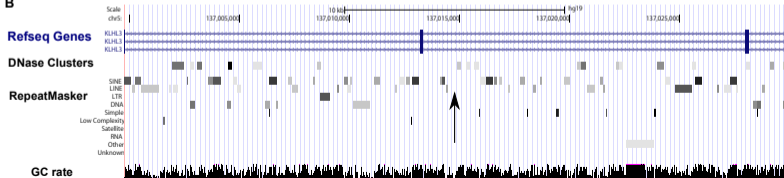

Supplement: supp_btw360_Supplementary_Figure8.pdf [file supp_btw360_Supplementary_Figure8.pdf]
